# Supplementary material for: Small regulatory RNAs controlled by genomic imprinting and their contribution to human disease
Source: PubMed Central journal article supplement — Epigenetics. 2012 Dec 1;7(12):1341–8. doi: 10.4161/epi.22884 (PMC3528689; doi:10.4161/epi.22884), 2012-12-01
Supplement: epi-7-1341-s01.pdf [file epi-7-1341-s01.pdf]

## **Supplemental Material to:**

**Michael Girardot Jérôme Cavallé and Robert Feil**

**Small regulatory RNAs controlled by genomic imprinting  
and their contribution to human disease**

**Epigenetics 2012; 7(12)**

**<http://dx.doi.org/10.4161/epi.22884>**

**<http://www.landesbioscience.com/journals/epigenetics/article/22884>**

| Name    | Chromosome | Start *   | End *     | strand | Precursor transcript | Parental chromosome | References                                                                                                                                                                                                                                                                                                                        |
|---------|------------|-----------|-----------|--------|----------------------|---------------------|-----------------------------------------------------------------------------------------------------------------------------------------------------------------------------------------------------------------------------------------------------------------------------------------------------------------------------------|
| miR-770 | chr14      | 101318727 | 101318824 | +      | GTL2 (MEG3)          | maternal            |                                                                                                                                                                                                                                                                                                                                   |
| miR-493 | chr14      | 101335397 | 101335485 | +      |                      | maternal            |                                                                                                                                                                                                                                                                                                                                   |
| miR-337 | chr14      | 101340830 | 101340922 | +      |                      | maternal            |                                                                                                                                                                                                                                                                                                                                   |
| miR-665 | chr14      | 101341370 | 101341441 | +      |                      | maternal            |                                                                                                                                                                                                                                                                                                                                   |
| miR-431 | chr14      | 101347344 | 101347457 | +      | RTL1as               | maternal            | Mouse miR-431 is specifically expressed in the central nervous system. <sup>1</sup>                                                                                                                                                                                                                                               |
| miR-433 | chr14      | 101348223 | 101348315 | +      | RTL1as               | maternal            | Human miR-433 expression level is decreased by five-fold in gastric carcinoma compared with normal gaster samples. <sup>2</sup><br>Analysis of 160 paired samples of non-tumour mucosa and gastric cancer demonstrated that the low expression level of miR-433 is associated with an unfavourable outcome. <sup>3</sup>          |
| miR-127 | chr14      | 101349316 | 101349412 | +      | RTL1as               | maternal            | miR-127 levels are decreased by 27-fold in osteosarcoma cell lines and human tumour tissues when compared with osteoblasts. <sup>4</sup><br>miR-127 expression can be increased by 3-fold in cancer cell-lines upon histone deacetylase inhibition and DNA methylation inhibition by reactivating cryptic promoters. <sup>5</sup> |
| miR-432 | chr14      | 101350820 | 101350913 | +      | RTL1as               | maternal            | miR-432 levels are decreased by 6-fold in osteosarcoma cell lines and human tumour tissues when compared with osteoblasts. <sup>4</sup>                                                                                                                                                                                           |
| miR-136 | chr14      | 101351039 | 101351120 | +      | RTL1as               | maternal            | Murine miR-136 was overexpressed more than 100-fold in murine lung adenocarcinoma compared to adjacent normal lung tissues. <sup>6</sup> The mouse miR-136 is highly expressed in the brain compared to pooled microRNAs from 8 different mouse                                                                                   |

|                          |       |           |           |   |      |          | organs. <sup>7</sup>                                                                                                                                                                                                                                                                                                                                                                                                                                                                                                                                                |
|--------------------------|-------|-----------|-----------|---|------|----------|---------------------------------------------------------------------------------------------------------------------------------------------------------------------------------------------------------------------------------------------------------------------------------------------------------------------------------------------------------------------------------------------------------------------------------------------------------------------------------------------------------------------------------------------------------------------|
| SNORD112<br>(14q(0))     | chr14 | 101364257 | 101364333 | + | MEG8 | maternal | C/D snoRNA specifically expressed in the mouse brain. <sup>8</sup>                                                                                                                                                                                                                                                                                                                                                                                                                                                                                                  |
| miR-370                  | chr14 | 101377476 | 101377550 | + |      | maternal | Human miR-370 expression levels were (on average) 4-fold increased in 40 samples of gastric cancers compared to 12 normal controls. <sup>9</sup> miR-370 increased the metastatic potential in xenograft assays, and is able to inhibit the translation of TGFβ-RII. <sup>9</sup> Human miR-370 was 20-fold increased, on average, in 100 samples of Acute Myeloid Leukemia compared to 2 normal bone marrow samples. <sup>10</sup> The human miR-370 is 15-fold increased during epithelial to mesenchymal transition of endometrial carcinosarcoma. <sup>11</sup> |
| SNORD113-1<br>(14q(l-1)) | chr14 | 101391158 | 101391227 | + |      | maternal | C/D snoRNA with marked expression in the brain. <sup>8</sup> This snoRNA is the precursor of piR-31650 in human testis. <sup>12</sup>                                                                                                                                                                                                                                                                                                                                                                                                                               |
| SNORD113-2<br>(14q(l-2)) | chr14 | 101393679 | 101393749 | + |      | maternal | C/D snoRNA with marked expression in the brain. <sup>8</sup>                                                                                                                                                                                                                                                                                                                                                                                                                                                                                                        |
| SNORD113-3<br>(14q(l-3)) | chr14 | 101396256 | 101396327 | + |      | maternal | C/D snoRNA with marked expression in the brain. <sup>8</sup>                                                                                                                                                                                                                                                                                                                                                                                                                                                                                                        |
| SNORD113-4<br>(14q(l-4)) | chr14 | 101402828 | 101402901 | + |      | maternal | C/D snoRNA with marked expression in the brain. <sup>8</sup>                                                                                                                                                                                                                                                                                                                                                                                                                                                                                                        |
| SNORD113-5<br>(14q(l-5)) | chr14 | 101404524 | 101404600 | + |      | maternal | C/D snoRNA with marked expression in the brain. <sup>8</sup>                                                                                                                                                                                                                                                                                                                                                                                                                                                                                                        |
| SNORD113-6<br>(14q(l-6)) | chr14 | 101405893 | 101405966 | + |      | maternal | C/D snoRNA with marked expression in the brain. <sup>8</sup>                                                                                                                                                                                                                                                                                                                                                                                                                                                                                                        |
| SNORD113-7<br>(14q(l-7)) | chr14 | 101407463 | 101407538 | + |      | maternal | C/D snoRNA with marked expression in the brain. <sup>8</sup>                                                                                                                                                                                                                                                                                                                                                                                                                                                                                                        |
| SNORD113-8<br>(14q(l-8)) | chr14 | 101409788 | 101409860 | + |      | maternal | C/D snoRNA with marked expression in the brain. <sup>8</sup>                                                                                                                                                                                                                                                                                                                                                                                                                                                                                                        |
| SNORD113-9               | chr14 | 101411986 | 101412056 | + |      | maternal | C/D snoRNA with marked expression in the                                                                                                                                                                                                                                                                                                                                                                                                                                                                                                                            |

| (14q(I-9))                  |       |           |           |   |          | brain. <sup>8</sup>                                                                                                                                                                                                                                                                          |
|-----------------------------|-------|-----------|-----------|---|----------|----------------------------------------------------------------------------------------------------------------------------------------------------------------------------------------------------------------------------------------------------------------------------------------------|
| SNORD114-1<br>(14q(II-1))   | chr14 | 101416170 | 101416240 | + | maternal | C/D snoRNA with marked expression in the brain. <sup>8</sup> This snoRNA is the precursor of piR-34456, piR-33510 and piR-34420 in human testis. <sup>12</sup> SNORD114-1(14q(II-1)) 50-fold over-expression promoted cell growth through cell cycle modulation in cell lines. <sup>13</sup> |
| SNORD114-2<br>(14q(II-2))   | chr14 | 101418193 | 101418269 | + | maternal | C/D snoRNA with marked expression in the brain. <sup>8</sup>                                                                                                                                                                                                                                 |
| SNORD114-3<br>(14q(II-3))   | chr14 | 101419686 | 101419759 | + | maternal | C/D snoRNA with marked expression in the brain. <sup>8</sup> This snoRNA is the precursor of piR-34372 in human testis. <sup>12</sup>                                                                                                                                                        |
| SNORD114-4<br>(14q(II-4))   | chr14 | 101420711 | 101420784 | + | maternal | C/D snoRNA with marked expression in the brain. <sup>8</sup>                                                                                                                                                                                                                                 |
| SNORD114-5<br>(14q(II-5))   | chr14 | 101421707 | 101421775 | + | maternal | C/D snoRNA with marked expression in the brain. <sup>8</sup>                                                                                                                                                                                                                                 |
| SNORD114-6<br>(14q(II-6))   | chr14 | 101423503 | 101423573 | + | maternal | C/D snoRNA with marked expression in the brain. <sup>8</sup>                                                                                                                                                                                                                                 |
| SNORD114-7<br>(14q(II-7))   | chr14 | 101429391 | 101429466 | + | maternal | C/D snoRNA with marked expression in the brain. <sup>8</sup>                                                                                                                                                                                                                                 |
| SNORD114-8<br>(14q(II-8))   | chr14 | 101431118 | 101431188 | + | maternal | C/D snoRNA with marked expression in the brain. <sup>8</sup>                                                                                                                                                                                                                                 |
| SNORD114-9<br>(14q(II-9))   | chr14 | 101432366 | 101432436 | + | maternal | C/D snoRNA with marked expression in the brain. <sup>8</sup>                                                                                                                                                                                                                                 |
| SNORD114-10<br>(14q(II-10)) | chr14 | 101433389 | 101433459 | + | maternal | C/D snoRNA with marked expression in the brain. <sup>8</sup>                                                                                                                                                                                                                                 |
| SNORD114-11<br>(14q(II-11)) | chr14 | 101434448 | 101434521 | + | maternal | C/D snoRNA with marked expression in the brain. <sup>8</sup>                                                                                                                                                                                                                                 |
| SNORD114-12<br>(14q(II-12)) | chr14 | 101435285 | 101435358 | + | maternal | C/D snoRNA with marked expression in the brain. <sup>8</sup>                                                                                                                                                                                                                                 |
| SNORD114-13<br>(14q(II-13)) | chr14 | 101438440 | 101438513 | + | maternal | C/D snoRNA with marked expression in the brain. <sup>8</sup>                                                                                                                                                                                                                                 |
| SNORD114-14                 | chr14 | 101438440 | 101438513 | + | maternal | C/D snoRNA with marked expression in the                                                                                                                                                                                                                                                     |

(14q(II-14))

brain.<sup>8</sup>

|                             |       |           |           |   |          |                                                                                                                                                     |
|-----------------------------|-------|-----------|-----------|---|----------|-----------------------------------------------------------------------------------------------------------------------------------------------------|
| SNORD114-15<br>(14q(II-15)) | chr14 | 101439007 | 101439077 | + | maternal | C/D snoRNA with marked expression in the brain. <sup>8</sup>                                                                                        |
| SNORD114-16<br>(14q(II-16)) | chr14 | 101439932 | 101440000 | + | maternal | C/D snoRNA with marked expression in the brain. <sup>8</sup>                                                                                        |
| SNORD114-17<br>(14q(II-17)) | chr14 | 101441143 | 101441216 | + | maternal | C/D snoRNA with marked expression in the brain. <sup>8</sup>                                                                                        |
| SNORD114-18<br>(14q(II-18)) | chr14 | 101442162 | 101442232 | + | maternal | C/D snoRNA with marked expression in the brain. <sup>8</sup>                                                                                        |
| SNORD114-19<br>(14q(II-19)) | chr14 | 101442814 | 101442887 | + | maternal | C/D snoRNA with marked expression in the brain. <sup>8</sup>                                                                                        |
| SNORD114-20<br>(14q(II-20)) | chr14 | 101447341 | 101447411 | + | maternal | C/D snoRNA with marked expression in the brain. <sup>8</sup>                                                                                        |
| SNORD114-21<br>(14q(II-21)) | chr14 | 101448312 | 101448382 | + | maternal | C/D snoRNA with marked expression in the brain. <sup>8</sup>                                                                                        |
| SNORD114-22<br>(14q(II-22)) | chr14 | 101449263 | 101449333 | + | maternal | C/D snoRNA with marked expression in the brain. <sup>8</sup> This snoRNA is the precursor of piR-33372 and piR-34929 in human testis. <sup>12</sup> |
| SNORD114-23<br>(14q(II-23)) | chr14 | 101450213 | 101450283 | + | maternal | C/D snoRNA with marked expression in the brain. <sup>8</sup> This snoRNA is the precursor of piR-34291 in human testis. <sup>12</sup>               |
| SNORD114-24<br>(14q(II-24)) | chr14 | 101451114 | 101451184 | + | maternal | C/D snoRNA with marked expression in the                                                                                                            |

|                            |       |           |           |   |          |                                                                                                                                                                                                      |
|----------------------------|-------|-----------|-----------|---|----------|------------------------------------------------------------------------------------------------------------------------------------------------------------------------------------------------------|
|                            |       |           |           |   |          | brain. <sup>8</sup>                                                                                                                                                                                  |
| SNORD114-25<br>(14qII-25)) | chr14 | 101452394 | 101452464 | + | maternal | C/D snoRNA with marked expression in the brain. <sup>8</sup>                                                                                                                                         |
| SNORD114-26<br>(14qII-26)) | chr14 | 101453383 | 101453453 | + | maternal | C/D snoRNA with marked expression in the brain. <sup>8</sup>                                                                                                                                         |
| SNORD114-27<br>(14qII-27)) | chr14 | 101454498 | 101454566 | + | maternal | C/D snoRNA with marked expression in the brain. <sup>8</sup>                                                                                                                                         |
| SNORD114-28<br>(14qII-28)) | chr14 | 101455467 | 101455537 | + | maternal | C/D snoRNA with marked expression in the brain. <sup>8</sup>                                                                                                                                         |
| SNORD114-29<br>(14qII-29)) | chr14 | 101456428 | 101456496 | + | maternal | C/D snoRNA with marked expression in the brain. <sup>8</sup>                                                                                                                                         |
| SNORD114-30<br>(14qII-30)) | chr14 | 101458256 | 101458326 | + | maternal | C/D snoRNA with marked expression in the brain. <sup>8</sup>                                                                                                                                         |
| SNORD114-31<br>(14qII-31)) | chr14 | 101459573 | 101459646 | + | maternal | C/D snoRNA with marked expression in the brain. <sup>8</sup>                                                                                                                                         |
| miR-379                    | chr14 | 101488403 | 101488469 | + | maternal | miR-379 levels are decreased in osteosarcoma cell lines and human tumour tissues when compared with osteoblasts. <sup>4</sup>                                                                        |
| miR-411                    | chr14 | 101489662 | 101489757 | + | maternal |                                                                                                                                                                                                      |
| miR-299                    | chr14 | 101490131 | 101490193 | + | maternal |                                                                                                                                                                                                      |
| miR-380                    | chr14 | 101491354 | 101491414 | + | maternal | Expressed in ES cells and provides a constitutive cell survival function by repressing the expression of p53. Its overexpression in neuroblastoma correlates with a poor outcome in individuals with |

|           |       |           |           |   |          | <i>MYCN</i> -amplified disease. <sup>14</sup>                                                                                                                                                                                                                                                                                                                                                                                                                                                                                                                                                                                                                                                                                                                                                                                                                                  |
|-----------|-------|-----------|-----------|---|----------|--------------------------------------------------------------------------------------------------------------------------------------------------------------------------------------------------------------------------------------------------------------------------------------------------------------------------------------------------------------------------------------------------------------------------------------------------------------------------------------------------------------------------------------------------------------------------------------------------------------------------------------------------------------------------------------------------------------------------------------------------------------------------------------------------------------------------------------------------------------------------------|
| miR-1197  | chr14 | 101491901 | 101491988 | + | maternal |                                                                                                                                                                                                                                                                                                                                                                                                                                                                                                                                                                                                                                                                                                                                                                                                                                                                                |
| miR-323   | chr14 | 101492069 | 101492154 | + | maternal |                                                                                                                                                                                                                                                                                                                                                                                                                                                                                                                                                                                                                                                                                                                                                                                                                                                                                |
| miR-758   | chr14 | 101492357 | 101492444 | + | maternal |                                                                                                                                                                                                                                                                                                                                                                                                                                                                                                                                                                                                                                                                                                                                                                                                                                                                                |
| miR-329-1 | chr14 | 101493122 | 101493201 | + | maternal | miR-329 levels are decreased in osteosarcoma cell lines and human tumour tissues when compared with osteoblasts. <sup>4</sup>                                                                                                                                                                                                                                                                                                                                                                                                                                                                                                                                                                                                                                                                                                                                                  |
| miR-329-2 | chr14 | 101493437 | 101493520 | + | maternal | miR-329 levels are decreased in osteosarcoma cell lines and human tumour tissues when compared with osteoblasts. <sup>4</sup>                                                                                                                                                                                                                                                                                                                                                                                                                                                                                                                                                                                                                                                                                                                                                  |
| miR-494   | chr14 | 101495971 | 101496051 | + | maternal | miR-494 expression level is 4-fold increased during neoplastic transformation of non-human primate cells. <sup>15</sup> miR-494 levels are decreased in osteosarcoma cell lines and human tumour tissues when compared with osteoblasts. <sup>4</sup> The 1.5 to 3.5-fold increased expression of miR-494 in a human lung cancer cell line was enough to target and inhibit (by 50%) the translation of the insulin-like growth factor 2 binding-protein 1 (IGFBP1) mRNA and maintains elevated (10 to 20-fold) IGF2 mRNA levels. <sup>16</sup> miR-494 can inhibit the growth of gastrointestinal stromal tumours cell lines by inhibiting the translation of the KIT receptor known to be overexpressed or activated by gain-of-function mutations in this cancer type. <sup>17</sup> The mouse miR-494 serum quantity presents diurnal oscillations in mouse. <sup>18</sup> |
| miR-1193  | chr14 | 101496389 | 101496466 | + | maternal |                                                                                                                                                                                                                                                                                                                                                                                                                                                                                                                                                                                                                                                                                                                                                                                                                                                                                |
| miR-543   | chr14 | 101498324 | 101498401 | + | maternal | miR-543 expression level is 5-fold increased during neoplastic transformation of non-human primate cells. <sup>15</sup>                                                                                                                                                                                                                                                                                                                                                                                                                                                                                                                                                                                                                                                                                                                                                        |

|            |       |           |           |   |          |                                                                                                                                                                                                                                                                                                                                                                                                                                                                                                                                                                                               |
|------------|-------|-----------|-----------|---|----------|-----------------------------------------------------------------------------------------------------------------------------------------------------------------------------------------------------------------------------------------------------------------------------------------------------------------------------------------------------------------------------------------------------------------------------------------------------------------------------------------------------------------------------------------------------------------------------------------------|
| miR-495    | chr14 | 101500092 | 101500173 | + | maternal | miR-495 expression level is 4-fold increased during neoplastic transformation of non-human primate cells. <sup>15</sup> miR-495 is 32-fold increased in breast cancer stem cell compared to breast cancer cells and is able to promote cell invasion and epithelial-mesenchymal transition <i>in-vivo</i> . <sup>19</sup> miR-495 was 2.4-fold increased in human KRAS-positive lung adenocarcinomas. <sup>20</sup> Expressed during liver and pancreas development and targets HNF-6 to modulate the effects of this transcription factor in liver and pancreas organogenesis. <sup>21</sup> |
| miR-376c   | chr14 | 101506027 | 101506092 | + | maternal | miR-376c expression level is 6-fold increased during neoplastic transformation of non-human primate cells. <sup>15</sup> miR-376c levels are 56-fold decreased in osteosarcoma cell lines and human tumor tissues when compared with osteoblasts. <sup>4</sup> miR-376c promotes survival of ovarian cancer cells <i>in-vitro</i> . <sup>22</sup>                                                                                                                                                                                                                                             |
| miR-376a-2 | chr14 | 101506406 | 101506485 | + | maternal | Human miR-376a can target CDK2 and Ago2 mRNAs. <sup>23</sup> miR-376a expression level is 8-fold increased during neoplastic transformation of non-human primate cells. <sup>15</sup> Murine miR-376a was overexpressed more than 30-fold in murine lung adenocarcinoma compared to adjacent normal lung tissues. <sup>6</sup> Mouse miR-376a is highly expressed in the brain compared to pooled microRNAs from 8 different mouse organs. <sup>7</sup> Human miR-376a expression level is 7-fold increased in a group of 28 pancreatic adenocarcinomas compared to                           |



|            |       |           |           |   |          |                                                                                                                                                                                                                                                                                                                                                                                                                                                                                                                                                                                                                             |
|------------|-------|-----------|-----------|---|----------|-----------------------------------------------------------------------------------------------------------------------------------------------------------------------------------------------------------------------------------------------------------------------------------------------------------------------------------------------------------------------------------------------------------------------------------------------------------------------------------------------------------------------------------------------------------------------------------------------------------------------------|
| miR-654    | chr14 | 101506556 | 101506636 | + | maternal | 15 adjacent healthy tissue biopsies. <sup>24</sup> miR-654 expression level is 7-fold increased during neoplastic transformation of non-human primate cells. <sup>15</sup>                                                                                                                                                                                                                                                                                                                                                                                                                                                  |
| miR-376b   | chr14 | 101506773 | 101506872 | + | maternal | miR-376b expression level is 5-fold increased during neoplastic transformation of non-human primate cells. <sup>15</sup> Human miR-376b expression level is frequently increased in breast cancer positive for the increased expression of the v-erb-b2 erythroblastic leukaemia viral oncogene homolog 2 receptor ( <i>HER2/neu</i> ). <sup>25</sup>                                                                                                                                                                                                                                                                       |
| miR-376a-1 | chr14 | 101507119 | 101507186 | + | maternal | The human miR-376a targets CDK2 and Ago2 mRNAs. <sup>23</sup> miR-376a expression level is 8-fold increased during neoplastic transformation of non-human primate cells. <sup>15</sup> Murine miR-376a was overexpressed more than 30-fold in murine lung adenocarcinoma compared to adjacent normal lung tissues. <sup>6</sup> The mouse miR-376a is highly expressed in the brain compared to pooled microRNAs from 8 different mouse organs. <sup>7</sup> Human miR-376a expression level is 7-fold increased in a group of 28 pancreatic adenocarcinomas compared to 15 adjacent healthy tissue biopsies. <sup>24</sup> |
| miR-300    | chr14 | 101507700 | 101507782 | + | maternal |                                                                                                                                                                                                                                                                                                                                                                                                                                                                                                                                                                                                                             |
| miR-1185-1 | chr14 | 101509314 | 101509399 | + | maternal |                                                                                                                                                                                                                                                                                                                                                                                                                                                                                                                                                                                                                             |
| miR-1185-2 | chr14 | 101510535 | 101510620 | + | maternal |                                                                                                                                                                                                                                                                                                                                                                                                                                                                                                                                                                                                                             |
| miR-381    | chr14 | 101512257 | 101512331 | + | maternal | Mouse miR-381 is a repressor of <i>Mitf</i> expression and is downregulated by Kit signaling in systemic mastocytosis. <sup>26</sup>                                                                                                                                                                                                                                                                                                                                                                                                                                                                                        |
| miR-487b   | chr14 | 101512792 | 101512875 | + | maternal | Human miR-487b is downregulated in high-                                                                                                                                                                                                                                                                                                                                                                                                                                                                                                                                                                                    |

|          |       |           |           |   |          |                                                                                                                                                                                                                                                                                                                                                                                                                                                                                                                                        |
|----------|-------|-----------|-----------|---|----------|----------------------------------------------------------------------------------------------------------------------------------------------------------------------------------------------------------------------------------------------------------------------------------------------------------------------------------------------------------------------------------------------------------------------------------------------------------------------------------------------------------------------------------------|
|          |       |           |           |   |          | risk neuroblastoma group of patients. <sup>27</sup> miR-487b levels are 20-fold decreased in osteosarcoma cell lines and human tumour tissues when compared with osteoblasts. <sup>4</sup>                                                                                                                                                                                                                                                                                                                                             |
| miR-539  | chr14 | 101513658 | 101513735 | + | maternal | Mouse miR-539 is a repressor of <i>Mitf</i> expression and is downregulated by Kit signalling in systemic mastocytosis. <sup>26</sup>                                                                                                                                                                                                                                                                                                                                                                                                  |
| miR-889  | chr14 | 101514238 | 101514316 | + | maternal |                                                                                                                                                                                                                                                                                                                                                                                                                                                                                                                                        |
| miR-544  | chr14 | 101514995 | 101515085 | + | maternal | Human miR-544 and other microRNAs from the 14q32 cluster are significantly downregulated in osteosarcoma compared to normal bone tissue. <sup>28</sup>                                                                                                                                                                                                                                                                                                                                                                                 |
| miR-655  | chr14 | 101515887 | 101515983 | + | maternal |                                                                                                                                                                                                                                                                                                                                                                                                                                                                                                                                        |
| miR-487a | chr14 | 101518783 | 101518862 | + | maternal |                                                                                                                                                                                                                                                                                                                                                                                                                                                                                                                                        |
| miR-382  | chr14 | 101520643 | 101520718 | + | maternal | Human miR-382 is induced 8-fold in TGF-beta treated human renal epithelial cells (a model of epithelial-mesenchymal transition) compared to untreated cells. <sup>29</sup> Human miR-382 expression level is increased in t(15;17) acute myeloid leukemia. <sup>30</sup> miR-382 expression level is 3-fold increased during neoplastic transformation of non-human primate cells. <sup>15</sup> miR-382 levels are 11-fold decreased in osteosarcoma cell lines and human tumour tissues when compared with osteoblasts. <sup>4</sup> |
| miR-134  | chr14 | 101521024 | 101521096 | + | maternal | miR-134 negatively regulates the size of dendritic spines in rat hippocampal neurons. <sup>31</sup> miR-134 is involved in the translational repression of the Pumilio2 mRNA during activity-dependant dendritic outgrowth. <sup>32</sup> Its expression level is 3 fold increased in the mouse pyramidal neurons                                                                                                                                                                                                                      |

|          |       |           |           |   |          |                                                                                                                                                                                                                                                                                                                                                                                                                                                                                                                                                                                                                                                                                       |
|----------|-------|-----------|-----------|---|----------|---------------------------------------------------------------------------------------------------------------------------------------------------------------------------------------------------------------------------------------------------------------------------------------------------------------------------------------------------------------------------------------------------------------------------------------------------------------------------------------------------------------------------------------------------------------------------------------------------------------------------------------------------------------------------------------|
|          |       |           |           |   |          | <p>during epilepsy and its silencing can protect mice from epileptic seizure.<sup>33</sup> miR-134 expression level is 2 fold increased in absence of the NAD-dependent deacetylase sirtuin-1 (SIRT1).<sup>34</sup> It downregulates Sox2 during Retinoic acid induced ES cell differentiation.<sup>35</sup> miR-134 expression level is 3-fold increased during neoplastic transformation of non-human primate cells.<sup>15</sup> miR-134 levels are 6-fold decreased in osteosarcoma cell lines and human tumour tissues when compared with osteoblasts.<sup>4</sup> The ectopic expression of miR-668 induces senescence in rapidly proliferating keratinocytes.<sup>36</sup></p> |
| miR-668  | chr14 | 101521595 | 101521660 | + | maternal |                                                                                                                                                                                                                                                                                                                                                                                                                                                                                                                                                                                                                                                                                       |
| miR-485  | chr14 | 101521756 | 101521828 | + | maternal | <p>Human miR-485 is a brain enriched microRNA involved in the regulation of synaptic development and function through inhibition of the presynaptic protein SV2A.<sup>37</sup> Human miR-485-5p expression level is 8-fold decreased in ovarian serous carcinoma compared to benign ovarian serous tumours.<sup>38</sup></p>                                                                                                                                                                                                                                                                                                                                                          |
| miR-323b | chr14 | 101522556 | 101522637 | + | maternal |                                                                                                                                                                                                                                                                                                                                                                                                                                                                                                                                                                                                                                                                                       |
| miR-154  | chr14 | 101526092 | 101526175 | + | maternal | <p>Murine miR-154 is 50% down-regulated after foetal ethanol exposure.<sup>39</sup> Human miR-154 was 43-fold increased, on average, in 100 samples of Acute Myeloid Leukemia compared to 2 normal bone marrow samples.<sup>10</sup> Its expression has been detected during the myeloid/erythroid progenitor commitment.<sup>40</sup> miR-154 is expressed in the stroma of foetal but not adult lung both in</p>                                                                                                                                                                                                                                                                    |

|         |       |           |           |   |          |                                                                                                                                                                                                                                                                                                                                                     |
|---------|-------|-----------|-----------|---|----------|-----------------------------------------------------------------------------------------------------------------------------------------------------------------------------------------------------------------------------------------------------------------------------------------------------------------------------------------------------|
|         |       |           |           |   |          | human and murine lungs. <sup>41</sup>                                                                                                                                                                                                                                                                                                               |
| miR-496 | chr14 | 101526910 | 101527011 | + | maternal | Human miR-496 expression in peripheral blood mononuclear cells decreases by 50% with age, <sup>42</sup> or during embryonic development upon ethanol exposure responsible for brain development retardation which can be reversed by folic acid. <sup>39</sup>                                                                                      |
| miR-377 | chr14 | 101528387 | 101528455 | + | maternal | Human miR-377 expression level is increasing during the trans-differentiation of mesenchymal stem cells into neuronal progenitors <i>in-vitro</i> . <sup>43</sup> miR-377 expression level is increased by two fold during cell growth arrest. <sup>44</sup>                                                                                        |
| miR-541 | chr14 | 101530832 | 101530915 | + | maternal |                                                                                                                                                                                                                                                                                                                                                     |
| miR-409 | chr14 | 101531637 | 101531715 | + | maternal | Human miR-409-3p is two-fold decreased on average in 90 gastric cancer samples compared to non-tumorous samples, and it suppresses metastasis in mice. <sup>45</sup> Mouse miR-409 was found to be significantly down-regulated in the brain of <i>Mecp2</i> -null (KO) (a model of Rett syndrome) compared to wild-type littermates. <sup>46</sup> |
| miR-412 | chr14 | 101531784 | 101531874 | + | maternal | Human miR-412 expression level is 3.8-fold increased in squamous cell lung carcinoma. <sup>47</sup>                                                                                                                                                                                                                                                 |
| miR-369 | chr14 | 101531935 | 101532004 | + | maternal | This microRNA is used for iPS reprogramming. <sup>48</sup>                                                                                                                                                                                                                                                                                          |
| miR-410 | chr14 | 101532249 | 101532328 | + | maternal | Specifically expressed in the central nervous system. <sup>1</sup> miR-410 expression level is 4-fold decreased on average in a cohort of high-risk compared to low-risk neuroblastoma patients. <sup>27</sup> However, its high expression                                                                                                         |

level is negatively associated with overall survival in advanced ovarian cancer.<sup>49</sup> miR-410 could inhibit cell-cycle progression through CDK1 translational inhibition.<sup>50</sup>

|           |       |           |           |   |        |          |                                                                                                                                                                                                                                                                             |
|-----------|-------|-----------|-----------|---|--------|----------|-----------------------------------------------------------------------------------------------------------------------------------------------------------------------------------------------------------------------------------------------------------------------------|
| miR-656   | chr14 | 101533061 | 101533138 | + |        | maternal |                                                                                                                                                                                                                                                                             |
| miR-1247  | chr14 | 102026759 | 102026624 | - | DIO3AS | ND       |                                                                                                                                                                                                                                                                             |
| miR-512-1 | chr19 | 54169933  | 54170016  | + |        | paternal |                                                                                                                                                                                                                                                                             |
| miR-512-2 | chr19 | 54172411  | 54172508  | + |        | paternal | miR-512-2 is frequently deleted (33%) in meduloblastomas. Its deletion correlates with MYC overexpression in meduloblastomas due to its binding and translational inhibition of <i>MYCC</i> 3'UTR. <sup>51</sup> This study suggests that miR-512-2 is a tumour suppressor. |
| miR-1323  | chr19 | 54175222  | 54175294  | + |        | paternal |                                                                                                                                                                                                                                                                             |
| miR-498   | chr19 | 54177451  | 54177574  | + |        | paternal | miR-498's high expression levels correlated with the probability of recurrence-free survival in human stage II colon cancer. <sup>52</sup> However, miR-498 was 3.6-fold increased in retinoblastoma compared to normal retinas. <sup>53</sup>                              |
| miR-520e  | chr19 | 54178965  | 54179051  | + |        | paternal | miR-520e is a tumour suppressor microRNA whose expression level is decreased by five-fold on average in hepatocellular carcinoma compared to non-tumorous liver. It may act through the targeting of NF-κB-inducing kinase (NIK) in hepatoma cells. <sup>54</sup>           |
| miR-515-1 | chr19 | 54182257  | 54182339  | + |        | paternal |                                                                                                                                                                                                                                                                             |
| miR-519e  | chr19 | 54183194  | 54183277  | + |        | paternal |                                                                                                                                                                                                                                                                             |
| miR-520f  | chr19 | 54185413  | 54185499  | + |        | paternal | Expression correlates with the progesterone receptor status in breast cancer. <sup>25</sup>                                                                                                                                                                                 |
| miR-515-2 | chr19 | 54188263  | 54188345  | + |        | paternal |                                                                                                                                                                                                                                                                             |

|            |       |          |          |   |          |                                                                                                                                                                                                                                                                                                                            |
|------------|-------|----------|----------|---|----------|----------------------------------------------------------------------------------------------------------------------------------------------------------------------------------------------------------------------------------------------------------------------------------------------------------------------------|
| miR-519c   | chr19 | 54189723 | 54189809 | + | paternal |                                                                                                                                                                                                                                                                                                                            |
| miR-1283-1 | chr19 | 54191735 | 54191821 | + | paternal |                                                                                                                                                                                                                                                                                                                            |
| miR-520a   | chr19 | 54194135 | 54194219 | + | paternal | miR-520a is expressed in the human placenta and is a pregnancy-associated microRNA detected in the maternal plasma. <sup>55</sup>                                                                                                                                                                                          |
| miR-526b   | chr19 | 54197647 | 54197729 | + | paternal |                                                                                                                                                                                                                                                                                                                            |
| miR-519b   | chr19 | 54198467 | 54198547 | + | paternal |                                                                                                                                                                                                                                                                                                                            |
| miR-525    | chr19 | 54200787 | 54200871 | + | paternal | Expressed in the human placenta and is a pregnancy-associated microRNA detected in the maternal plasma. <sup>55</sup>                                                                                                                                                                                                      |
| miR-523    | chr19 | 54201639 | 54201725 | + | paternal |                                                                                                                                                                                                                                                                                                                            |
| miR-518f   | chr19 | 54203269 | 54203355 | + | paternal |                                                                                                                                                                                                                                                                                                                            |
| miR-520b   | chr19 | 54204481 | 54204541 | + | paternal | Induced by IFN-gamma and can downregulate NKG2D ligand MHC class I-related chain A (MICA), which binds to a receptor (NKG2D) used by NK cells to detect virally infected and transformed cells. <sup>56</sup> Expression levels are inversely correlated to the metastatic potential of breast cancer cells. <sup>57</sup> |
| miR-518b   | chr19 | 54205991 | 54206073 | + | paternal | Expressed in the human placenta and is a pregnancy-associated microRNA detected in the maternal plasma. <sup>55</sup>                                                                                                                                                                                                      |
| miR-526a-1 | chr19 | 54209506 | 54209590 | + | paternal | Expressed in the human placenta and is a pregnancy-associated microRNA detected in the maternal plasma. <sup>55</sup>                                                                                                                                                                                                      |
| miR-520c   | chr19 | 54210707 | 54210793 | + | paternal | Promotes tumour invasion and metastasis. <sup>58</sup> Increased during breast tumorigenesis and metastasis. <sup>59</sup>                                                                                                                                                                                                 |
| miR-518c   | chr19 | 54211989 | 54212089 | + | paternal | Highly expressed in retinoblastoma. <sup>53</sup> Significantly upregulated in pre-eclamptic placentas where it could downregulate the                                                                                                                                                                                     |

|            |       |          |          |   |          | level of hydroxysteroid (17- $\beta$ )<br>dehydrogenase 1 (HSD17B1), a steroidogenic<br>enzyme expressed in the placenta. <sup>60</sup>                                                                                                                                                                                            |
|------------|-------|----------|----------|---|----------|------------------------------------------------------------------------------------------------------------------------------------------------------------------------------------------------------------------------------------------------------------------------------------------------------------------------------------|
| miR-524    | chr19 | 54214256 | 54214342 | + | paternal |                                                                                                                                                                                                                                                                                                                                    |
| miR-517a   | chr19 | 54215522 | 54215608 | + | paternal | Promotes tumorigenesis and metastasis <i>in vivo</i> . <sup>61</sup>                                                                                                                                                                                                                                                               |
| miR-519d   | chr19 | 54216601 | 54216688 | + | paternal | Overexpressed in adipose tissue of non-diabetic severely obese adults. Inhibits the translation of the peroxisome proliferator-activated receptor- $\alpha$ (PPARA). <sup>62</sup> Expression is activated by DNA hypomethylation and p53 mediated transcriptional activation in hepatocellular carcinoma cell line. <sup>63</sup> |
| miR-521-2  | chr19 | 54219848 | 54219934 | + | paternal |                                                                                                                                                                                                                                                                                                                                    |
| miR-520d   | chr19 | 54223350 | 54223436 | + | paternal |                                                                                                                                                                                                                                                                                                                                    |
| miR-517b   | chr19 | 54224330 | 54224396 | + | paternal |                                                                                                                                                                                                                                                                                                                                    |
| miR-520g   | chr19 | 54225420 | 54225509 | + | paternal | Frequently amplified in a subtype of aggressive primitive neuroectodermal brain tumours where it acts as an oncogene. <sup>64</sup>                                                                                                                                                                                                |
| miR-516b-2 | chr19 | 54228696 | 54228780 | + | paternal |                                                                                                                                                                                                                                                                                                                                    |
| miR-526a-2 | chr19 | 54230176 | 54230240 | + | paternal |                                                                                                                                                                                                                                                                                                                                    |
| miR-518e   | chr19 | 54233092 | 54233179 | + | paternal |                                                                                                                                                                                                                                                                                                                                    |
| miR-518a-1 | chr19 | 54234260 | 54234344 | + | paternal |                                                                                                                                                                                                                                                                                                                                    |
| miR-518d   | chr19 | 54238131 | 54238217 | + | paternal |                                                                                                                                                                                                                                                                                                                                    |
| miR-516b-1 | chr19 | 54240099 | 54240188 | + | paternal |                                                                                                                                                                                                                                                                                                                                    |
| miR-518a-2 | chr19 | 54242587 | 54242673 | + | paternal |                                                                                                                                                                                                                                                                                                                                    |
| miR-517c   | chr19 | 54244567 | 54244661 | + | paternal | Frequently amplified in a subtype of aggressive primitive neuroectodermal brain tumours where they act as oncogenes. <sup>64</sup>                                                                                                                                                                                                 |
| miR-520h   | chr19 | 54245766 | 54245853 | + | paternal | Expressed in the human placenta and is a pregnancy-associated microRNA detected in the maternal plasma. <sup>55</sup> Overexpressed in                                                                                                                                                                                             |

hematopoietic stem cells.<sup>65</sup> The tumour suppressing activities, such as cancer cell-mobility and in vitro invasion, mediated by the adenovirus type 5 E1A may be exerted in part by the E1A-mediated downregulation of miR-520h expression.<sup>66</sup>

|            |       |          |          |   |          |                                                                                                                                                                                                                                                                                                                                                                                                                                                                                                                                                                                           |
|------------|-------|----------|----------|---|----------|-------------------------------------------------------------------------------------------------------------------------------------------------------------------------------------------------------------------------------------------------------------------------------------------------------------------------------------------------------------------------------------------------------------------------------------------------------------------------------------------------------------------------------------------------------------------------------------------|
| miR-521-1  | chr19 | 54251890 | 54251976 | + | paternal |                                                                                                                                                                                                                                                                                                                                                                                                                                                                                                                                                                                           |
| miR-522    | chr19 | 54254465 | 54254551 | + | paternal | A polymorphism in the 3'UTR sequence of PLIN4, a member of the PAT family of lipid storage droplet protein, modulates the miR-522 seed sequence recognition and has an impact on obesity related phenotypes in humans. <sup>67</sup>                                                                                                                                                                                                                                                                                                                                                      |
| miR-519a-1 | chr19 | 54255651 | 54255735 | + | paternal | Upregulated in ovarian tumours. <sup>38</sup>                                                                                                                                                                                                                                                                                                                                                                                                                                                                                                                                             |
| miR-527    | chr19 | 54257272 | 54257356 | + | paternal |                                                                                                                                                                                                                                                                                                                                                                                                                                                                                                                                                                                           |
| miR-516a-1 | chr19 | 54259995 | 54260084 | + | paternal |                                                                                                                                                                                                                                                                                                                                                                                                                                                                                                                                                                                           |
| miR-1283-2 | chr19 | 54261486 | 54261572 | + | paternal |                                                                                                                                                                                                                                                                                                                                                                                                                                                                                                                                                                                           |
| miR-516a-2 | chr19 | 54264387 | 54264476 | + | paternal |                                                                                                                                                                                                                                                                                                                                                                                                                                                                                                                                                                                           |
| miR-519a-2 | chr19 | 54265598 | 54265684 | + | paternal | Upregulated in ovarian tumours. <sup>38</sup>                                                                                                                                                                                                                                                                                                                                                                                                                                                                                                                                             |
| miR-371    | chr19 | 54290929 | 54290995 | + | paternal | The miR-371-373 microRNA cluster is overexpressed in human testicular germ cells, <sup>68</sup> and downregulated in human non-obstructive azoospermia. <sup>69</sup> Expression of the miR-371-373 cluster is a hallmark of the human embryonic stem cells compared to human induced pluripotent stem cells. <sup>70</sup> Overexpressed in a rare embryonal neoplasm derived from liver progenitor cells in a c-Myc-dependent manner and could contribute to the invasiveness of the tumours and poor prognosis. <sup>71</sup> Expression level appears to have both a predictive and a |



|         |       |          |          |   |          |                                                                                                                                                                                                                                                                                                                                                                                                                                                                                                                                                                              |
|---------|-------|----------|----------|---|----------|------------------------------------------------------------------------------------------------------------------------------------------------------------------------------------------------------------------------------------------------------------------------------------------------------------------------------------------------------------------------------------------------------------------------------------------------------------------------------------------------------------------------------------------------------------------------------|
|         |       |          |          |   |          | functional role in determining human pluripotent stem cell neurogenic differentiation behaviour. <sup>72</sup>                                                                                                                                                                                                                                                                                                                                                                                                                                                               |
|         |       |          |          |   |          | The miR-371-373 microRNA cluster is overexpressed in human testicular germ cells, <sup>68</sup> and downregulated in human non-obstructive azoospermia. <sup>69</sup> Expression of the miR-371-373 cluster is a hallmark of the human embryonic stem cells compared to human induced pluripotent stem cells. <sup>70</sup>                                                                                                                                                                                                                                                  |
| miR-372 | chr19 | 54291144 | 54291210 | + | paternal | Overexpressed in a rare embryonal neoplasm derived from liver progenitor cells in a c-Myc-dependent manner and could contribute to the invasiveness of the tumours and poor prognosis. <sup>71</sup> Expression level appears to have both a predictive and a functional role in determining human pluripotent stem cell neurogenic differentiation behavior. <sup>72</sup> Promotes somatic cell reprogramming by targeting multiple cellular processes such as cell-cycle, epithelial-mesenchymal transition, epigenetic regulation and vesicular transport. <sup>73</sup> |
|         |       |          |          |   |          | Highly expressed in retinoblastoma. <sup>53</sup> Promotes tumour invasion and metastasis. <sup>58</sup> Increased during breast tumourigenesis and metastasis. <sup>59</sup> The miR-371-373 microRNA cluster is overexpressed in human testicular germ cells, <sup>68</sup> and downregulated in human non-obstructive azoospermia. <sup>69</sup> Expression of the miR-371-373 cluster is a hallmark of the human embryonic stem cells compared                                                                                                                           |
| miR-373 | chr19 | 54291959 | 54292027 | + | paternal |                                                                                                                                                                                                                                                                                                                                                                                                                                                                                                                                                                              |

to human induced pluripotent stem cells.<sup>70</sup>  
 Overexpressed in a rare embryonal neoplasm derived from liver progenitor cells in a c-Myc-dependent manner and could contribute to the invasiveness of the tumours and poor prognosis.<sup>71</sup> Expression level appears to have both a predictive and a functional role in determining human pluripotent stem cell neurogenic differentiation behavior.<sup>72</sup> Downregulates more than 30 proteins involved in the regulation of invasion and metastasis in breast cancer cell line.<sup>74</sup>

|                           |       |          |          |   |             |          |                                                                                          |
|---------------------------|-------|----------|----------|---|-------------|----------|------------------------------------------------------------------------------------------|
| SNORD107<br>(HBII-436)    | chr15 | 25227141 | 25227215 | + | SNURF-SNRPN | paternal | C/D snoRNA. <sup>75</sup>                                                                |
| SNORD64<br>(HBII-13)      | chr15 | 25230247 | 25230313 | + | SNURF-SNRPN | paternal | C/D snoRNA. <sup>75</sup>                                                                |
| SNORD108<br>(HBII-437)    | chr15 | 25232072 | 25232142 | + | SNURF-SNRPN | paternal | C/D snoRNA. <sup>75</sup>                                                                |
| SNORD109A<br>(HBII-438A)  | chr15 | 25287121 | 25287187 | + | SNURF-SNRPN | paternal | C/D snoRNA. <sup>75</sup>                                                                |
| SNORD116-1<br>(HBII-85-1) | chr15 | 25296623 | 25296719 | + | SNURF-SNRPN | paternal | C/D snoRNA <sup>75</sup> Gene-candidate for PWS.<br>Ubiquitously-expressed. <sup>8</sup> |
| SNORD116-2<br>(HBII-85-2) | chr15 | 25299356 | 25299452 | + | SNURF-SNRPN | paternal | C/D snoRNA <sup>75</sup> Gene-candidate for PWS.<br>Ubiquitously-expressed. <sup>8</sup> |
| SNORD116-3<br>(HBII-85-3) | chr15 | 25302006 | 25302102 | + | SNURF-SNRPN | paternal | C/D snoRNA <sup>75</sup> Gene-candidate for PWS.<br>Ubiquitously-expressed. <sup>8</sup> |
| SNORD116-4<br>(HBII-85-4) | chr15 | 25304684 | 25304781 | + | SNURF-SNRPN | paternal | C/D snoRNA <sup>75</sup> Gene-candidate for PWS.<br>Ubiquitously-expressed. <sup>8</sup> |

|                             |       |          |          |   |             |          |                                                                                          |
|-----------------------------|-------|----------|----------|---|-------------|----------|------------------------------------------------------------------------------------------|
| SNORD116-5<br>(HBII-85-5)   | chr15 | 25307479 | 25307575 | + | SNURF-SNRPN | paternal | C/D snoRNA <sup>75</sup> Gene-candidate for PWS.<br>Ubiquitously-expressed. <sup>8</sup> |
| SNORD116-6<br>(HBII-85-6)   | chr15 | 25310172 | 25310269 | + | SNURF-SNRPN | paternal | C/D snoRNA <sup>75</sup> Gene-candidate for PWS.<br>Ubiquitously-expressed. <sup>8</sup> |
| SNORD116-7<br>(HBII-85-7)   | chr15 | 25312934 | 25313030 | + | SNURF-SNRPN | paternal | C/D snoRNA <sup>75</sup> Gene-candidate for PWS.<br>Ubiquitously-expressed. <sup>8</sup> |
| SNORD116-8<br>(HBII-85-8)   | chr15 | 25315578 | 25315674 | + | SNURF-SNRPN | paternal | C/D snoRNA <sup>75</sup> Gene-candidate for PWS.<br>Ubiquitously-expressed. <sup>8</sup> |
| SNORD116-9<br>(HBII-85-9)   | chr15 | 25318253 | 25318349 | + | SNURF-SNRPN | paternal | C/D snoRNA <sup>75</sup> Gene-candidate for PWS.<br>Ubiquitously-expressed. <sup>8</sup> |
| SNORD116-10<br>(HBII-85-10) | chr15 | 25319260 | 25319363 | + | SNURF-SNRPN | paternal | C/D snoRNA <sup>75</sup> Gene-candidate for PWS.<br>Ubiquitously-expressed. <sup>8</sup> |
| SNORD116-11<br>(HBII-85-11) | chr15 | 25321075 | 25321168 | + | SNURF-SNRPN | paternal | C/D snoRNA <sup>75</sup> Gene-candidate for PWS.<br>Ubiquitously-expressed. <sup>8</sup> |
| SNORD116-12<br>(HBII-85-12) | chr15 | 25322197 | 25322290 | + | SNURF-SNRPN | paternal | C/D snoRNA <sup>75</sup> Gene-candidate for PWS.<br>Ubiquitously-expressed. <sup>8</sup> |
| SNORD116-13<br>(HBII-85-13) | chr15 | 25324204 | 25324297 | + | SNURF-SNRPN | paternal | C/D snoRNA <sup>75</sup> Gene-candidate for PWS.<br>Ubiquitously-expressed. <sup>8</sup> |
| SNORD116-14<br>(HBII-85-14) | chr15 | 25325288 | 25325381 | + | SNURF-SNRPN | paternal | C/D snoRNA <sup>75</sup> Gene-candidate for PWS.<br>Ubiquitously-expressed. <sup>8</sup> |
| SNORD116-15<br>(HBII-85-15) | chr15 | 25326433 | 25326526 | + | SNURF-SNRPN | paternal | C/D snoRNA <sup>75</sup> Gene-candidate for PWS.<br>Ubiquitously-expressed. <sup>8</sup> |

|                             |       |          |          |   |             |          |                                                                                          |
|-----------------------------|-------|----------|----------|---|-------------|----------|------------------------------------------------------------------------------------------|
| SNORD116-16<br>(HBII-85-16) | chr15 | 25327914 | 25328007 | + | SNURF-SNRPN | paternal | C/D snoRNA <sup>75</sup> Gene-candidate for PWS.<br>Ubiquitously-expressed. <sup>8</sup> |
| SNORD116-17<br>(HBII-85-17) | chr15 | 25328734 | 25328827 | + | SNURF-SNRPN | paternal | C/D snoRNA <sup>75</sup> Gene-candidate for PWS.<br>Ubiquitously-expressed. <sup>8</sup> |
| SNORD116-18<br>(HBII-85-18) | chr15 | 25330531 | 25330624 | + | SNURF-SNRPN | paternal | C/D snoRNA <sup>75</sup> Gene-candidate for PWS.<br>Ubiquitously-expressed. <sup>8</sup> |
| SNORD116-19<br>(HBII-85-19) | chr15 | 25331673 | 25331766 | + | SNURF-SNRPN | paternal | C/D snoRNA <sup>75</sup> Gene-candidate for PWS.<br>Ubiquitously-expressed. <sup>8</sup> |
| SNORD116-20<br>(HBII-85-20) | chr15 | 25332808 | 25332901 | + | SNURF-SNRPN | paternal | C/D snoRNA <sup>75</sup> Gene-candidate for PWS.<br>Ubiquitously-expressed. <sup>8</sup> |
| SNORD116-21<br>(HBII-85-21) | chr15 | 25333950 | 25334043 | + | SNURF-SNRPN | paternal | C/D snoRNA <sup>75</sup> Gene-candidate for PWS.<br>Ubiquitously-expressed. <sup>8</sup> |
| SNORD116-22<br>(HBII-85-22) | chr15 | 25335069 | 25335162 | + | SNURF-SNRPN | paternal | C/D snoRNA <sup>75</sup> Gene-candidate for PWS.<br>Ubiquitously-expressed. <sup>8</sup> |
| SNORD116-23<br>(HBII-85-23) | chr15 | 25336932 | 25337025 | + | SNURF-SNRPN | paternal | C/D snoRNA <sup>75</sup> Gene-candidate for PWS.<br>Ubiquitously-expressed. <sup>8</sup> |
| SNORD116-24<br>(HBII-85-24) | chr15 | 25339183 | 25339276 | + | SNURF-SNRPN | paternal | C/D snoRNA <sup>75</sup> Gene-candidate for PWS.<br>Ubiquitously-expressed. <sup>8</sup> |
| SNORD116-25<br>(HBII-85-25) | chr15 | 25342809 | 25342902 | + | SNURF-SNRPN | paternal | C/D snoRNA <sup>75</sup> Gene-candidate for PWS.<br>Ubiquitously-expressed. <sup>8</sup> |
| SNORD116-26<br>(HBII-85-26) | chr15 | 25344645 | 25344742 | + | SNURF-SNRPN | paternal | C/D snoRNA <sup>75</sup> Gene-candidate for PWS.<br>Ubiquitously-expressed. <sup>8</sup> |

|                             |       |          |          |   |             |          |                                                                                                                                                    |
|-----------------------------|-------|----------|----------|---|-------------|----------|----------------------------------------------------------------------------------------------------------------------------------------------------|
| SNORD116-27<br>(HBII-85-27) | chr15 | 25346721 | 25346814 | + | SNURF-SNRPN | paternal | C/D snoRNA <sup>75</sup> Gene-candidate for PWS. Ubiquitously-expressed. <sup>8</sup>                                                              |
| SNORD116-28<br>(HBII-85-28) | chr15 | 25349788 | 25349880 | + | SNURF-SNRPN | paternal | C/D snoRNA <sup>75</sup> Gene-candidate for PWS. Ubiquitously-expressed. <sup>8</sup>                                                              |
| SNORD116-29<br>(HBII-85-29) | chr15 | 25351667 | 25351751 | + | SNURF-SNRPN | paternal | C/D snoRNA <sup>75</sup> Gene-candidate for PWS. Ubiquitously-expressed. <sup>8</sup>                                                              |
| SNORD115-1<br>(HBII-52-1)   | chr15 | 25415870 | 25415951 | + | SNURF-SNRPN | paternal | C/D snoRNA <sup>75</sup> Post-transcriptional regulator of 5-HT2C pre-mRNA (editing, splicing)". Specifically expressed in the brain. <sup>8</sup> |
| SNORD115-2<br>(HBII-52-2)   | chr15 | 25417782 | 25417863 | + | SNURF-SNRPN | paternal | C/D snoRNA <sup>75</sup> Post-transcriptional regulator of 5-HT2C pre-mRNA (editing, splicing). Specifically expressed in the brain. <sup>8</sup>  |
| SNORD115-3<br>(HBII-52-3)   | chr15 | 25420074 | 25420155 | + | SNURF-SNRPN | paternal | C/D snoRNA <sup>75</sup> Post-transcriptional regulator of 5-HT2C pre-mRNA (editing, splicing). Specifically expressed in the brain. <sup>8</sup>  |
| SNORD115-4<br>(HBII-52-4)   | chr15 | 25421979 | 25422060 | + | SNURF-SNRPN | paternal | C/D snoRNA <sup>75</sup> Post-transcriptional regulator of 5-HT2C pre-mRNA (editing, splicing). Specifically expressed in the brain. <sup>8</sup>  |
| SNORD115-5<br>(HBII-52-5)   | chr15 | 25423885 | 25423966 | + | SNURF-SNRPN | paternal | C/D snoRNA <sup>75</sup> Post-transcriptional regulator of 5-HT2C pre-mRNA (editing,                                                               |

|                             |       |          |          |   |             |          |                                                                                                                                           |
|-----------------------------|-------|----------|----------|---|-------------|----------|-------------------------------------------------------------------------------------------------------------------------------------------|
|                             |       |          |          |   |             |          | splicing). Specifically expressed in the brain.<br>8                                                                                      |
| SNORD115-6<br>(HBII-52-6)   | chr15 | 25425644 | 25425725 | + | SNURF-SNRPN | paternal | C/D snoRNA <sup>75</sup> Post-transcriptional regulator of 5-HT2C pre-mRNA (editing, splicing). Specifically expressed in the brain.<br>8 |
| SNORD115-7<br>(HBII-52-7)   | chr15 | 25427532 | 25427613 | + | SNURF-SNRPN | paternal | C/D snoRNA <sup>75</sup> Post-transcriptional regulator of 5-HT2C pre-mRNA (editing, splicing). Specifically expressed in the brain.<br>8 |
| SNORD115-8<br>(HBII-52-8)   | chr15 | 25429453 | 25429534 | + | SNURF-SNRPN | paternal | C/D snoRNA <sup>75</sup> Post-transcriptional regulator of 5-HT2C pre-mRNA (editing, splicing). Specifically expressed in the brain.<br>8 |
| SNORD115-9<br>(HBII-52-9)   | chr15 | 25430778 | 25430859 | + | SNURF-SNRPN | paternal | C/D snoRNA <sup>75</sup> Post-transcriptional regulator of 5-HT2C pre-mRNA (editing, splicing). Specifically expressed in the brain.<br>8 |
| SNORD115-10<br>(HBII-52-10) | chr15 | 25432683 | 25432763 | + | SNURF-SNRPN | paternal | C/D snoRNA <sup>75</sup> Post-transcriptional regulator of 5-HT2C pre-mRNA (editing, splicing). Specifically expressed in the brain.<br>8 |
| SNORD115-11<br>(HBII-52-11) | chr15 | 25434561 | 25434642 | + | SNURF-SNRPN | paternal | C/D snoRNA <sup>75</sup> Post-transcriptional regulator of 5-HT2C pre-mRNA (editing, splicing). Specifically expressed in the brain.      |

|                             |       |          |          |   |             |          |                                                                                                                                      |   |
|-----------------------------|-------|----------|----------|---|-------------|----------|--------------------------------------------------------------------------------------------------------------------------------------|---|
|                             |       |          |          |   |             |          |                                                                                                                                      | 8 |
| SNORD115-12<br>(HBII-52-12) | chr15 | 25436563 | 25436644 | + | SNURF-SNRPN | paternal | C/D snoRNA <sup>75</sup> Post-transcriptional regulator of 5-HT2C pre-mRNA (editing, splicing). Specifically expressed in the brain. | 8 |
| SNORD115-13<br>(HBII-52-13) | chr15 | 25438468 | 25438549 | + | SNURF-SNRPN | paternal | C/D snoRNA <sup>75</sup> Post-transcriptional regulator of 5-HT2C pre-mRNA (editing, splicing). Specifically expressed in the brain. | 8 |
| SNORD115-14<br>(HBII-52-14) | chr15 | 25440068 | 25440148 | + | SNURF-SNRPN | paternal | C/D snoRNA <sup>75</sup> Post-transcriptional regulator of 5-HT2C pre-mRNA (editing, splicing). Specifically expressed in the brain. | 8 |
| SNORD115-15<br>(HBII-52-15) | chr15 | 25442723 | 25442803 | + | SNURF-SNRPN | paternal | C/D snoRNA <sup>75</sup> Post-transcriptional regulator of 5-HT2C pre-mRNA (editing, splicing). Specifically expressed in the brain. | 8 |
| SNORD115-16<br>(HBII-52-16) | chr15 | 25444595 | 25444676 | + | SNURF-SNRPN | paternal | C/D snoRNA <sup>75</sup> Post-transcriptional regulator of 5-HT2C pre-mRNA (editing, splicing). Specifically expressed in the brain. | 8 |
| SNORD115-17<br>(HBII-52-17) | chr15 | 25446470 | 25446551 | + | SNURF-SNRPN | paternal | C/D snoRNA <sup>75</sup> Post-transcriptional regulator of 5-HT2C pre-mRNA (editing, splicing). Specifically expressed in the brain. |   |

|                             |       |          |          |   |             |          |                                                                                                                                      |   |
|-----------------------------|-------|----------|----------|---|-------------|----------|--------------------------------------------------------------------------------------------------------------------------------------|---|
|                             |       |          |          |   |             |          |                                                                                                                                      | 8 |
| SNORD115-18<br>(HBII-52-18) | chr15 | 25448374 | 25448455 | + | SNURF-SNRPN | paternal | C/D snoRNA <sup>75</sup> Post-transcriptional regulator of 5-HT2C pre-mRNA (editing, splicing). Specifically expressed in the brain. | 8 |
| SNORD115-19<br>(HBII-52-19) | chr15 | 25449504 | 25449585 | + | SNURF-SNRPN | paternal | C/D snoRNA <sup>75</sup> Post-transcriptional regulator of 5-HT2C pre-mRNA (editing, splicing). Specifically expressed in the brain. | 8 |
| SNORD115-20<br>(HBII-52-20) | chr15 | 25451409 | 25451490 | + | SNURF-SNRPN | paternal | C/D snoRNA <sup>75</sup> Post-transcriptional regulator of 5-HT2C pre-mRNA (editing, splicing). Specifically expressed in the brain. | 8 |
| SNORD115-21<br>(HBII-52-21) | chr15 | 25453230 | 25453310 | + | SNURF-SNRPN | paternal | C/D snoRNA <sup>75</sup> Post-transcriptional regulator of 5-HT2C pre-mRNA (editing, splicing). Specifically expressed in the brain. | 8 |
| SNORD115-22<br>(HBII-52-22) | chr15 | 25455065 | 25455146 | + | SNURF-SNRPN | paternal | C/D snoRNA <sup>75</sup> Post-transcriptional regulator of 5-HT2C pre-mRNA (editing, splicing). Specifically expressed in the brain. | 8 |
| SNORD115-23<br>(HBII-52-23) | chr15 | 25456943 | 25457024 | + | SNURF-SNRPN | paternal | C/D snoRNA <sup>75</sup> Post-transcriptional regulator of 5-HT2C pre-mRNA (editing, splicing). Specifically expressed in the brain. |   |



|                             |       |          |          |   |             |          |                                                                                                                                      | 8 |
|-----------------------------|-------|----------|----------|---|-------------|----------|--------------------------------------------------------------------------------------------------------------------------------------|---|
| SNORD115-24<br>(HBII-52-24) | chr15 | 25458806 | 25458876 | + | SNURF-SNRPN | paternal | C/D snoRNA <sup>75</sup> Post-transcriptional regulator of 5-HT2C pre-mRNA (editing, splicing). Specifically expressed in the brain. | 8 |
| SNORD115-25<br>(HBII-52-25) | chr15 | 25460688 | 25460769 | + | SNURF-SNRPN | paternal | C/D snoRNA <sup>75</sup> Post-transcriptional regulator of 5-HT2C pre-mRNA (editing, splicing). Specifically expressed in the brain. | 8 |
| SNORD115-26<br>(HBII-52-26) | chr15 | 25463764 | 25463845 | + | SNURF-SNRPN | paternal | C/D snoRNA <sup>75</sup> Post-transcriptional regulator of 5-HT2C pre-mRNA (editing, splicing). Specifically expressed in the brain. | 8 |
| SNORD115-27<br>(HBII-52-27) | chr15 | 25465650 | 25465725 | + | SNURF-SNRPN | paternal | C/D snoRNA <sup>75</sup> Post-transcriptional regulator of 5-HT2C pre-mRNA (editing, splicing). Specifically expressed in the brain. | 8 |
| SNORD115-28<br>(HBII-52-28) | chr15 | 25467501 | 25467574 | + | SNURF-SNRPN | paternal | C/D snoRNA <sup>75</sup> Post-transcriptional regulator of 5-HT2C pre-mRNA (editing, splicing). Specifically expressed in the brain. | 8 |
| SNORD115-29<br>(HBII-52-29) | chr15 | 25468393 | 25468474 | + | SNURF-SNRPN | paternal | C/D snoRNA <sup>75</sup> Post-transcriptional regulator of 5-HT2C pre-mRNA (editing, splicing). Specifically expressed in the brain. |   |

|                             |       |          |          |   |             |          |                                                                                                                                      | 8 |
|-----------------------------|-------|----------|----------|---|-------------|----------|--------------------------------------------------------------------------------------------------------------------------------------|---|
| SNORD115-30<br>(HBII-52-30) | chr15 | 25470350 | 25470431 | + | SNURF-SNRPN | paternal | C/D snoRNA <sup>75</sup> Post-transcriptional regulator of 5-HT2C pre-mRNA (editing, splicing). Specifically expressed in the brain. | 8 |
| SNORD115-31<br>(HBII-52-31) | chr15 | 25472256 | 25472337 | + | SNURF-SNRPN | paternal | C/D snoRNA <sup>75</sup> Post-transcriptional regulator of 5-HT2C pre-mRNA (editing, splicing). Specifically expressed in the brain. | 8 |
| SNORD115-32<br>(HBII-52-32) | chr15 | 25474114 | 25474195 | + | SNURF-SNRPN | paternal | C/D snoRNA <sup>75</sup> Post-transcriptional regulator of 5-HT2C pre-mRNA (editing, splicing). Specifically expressed in the brain. | 8 |
| SNORD115-33<br>(HBII-52-33) | chr15 | 25475985 | 25476066 | + | SNURF-SNRPN | paternal | C/D snoRNA <sup>75</sup> Post-transcriptional regulator of 5-HT2C pre-mRNA (editing, splicing). Specifically expressed in the brain. | 8 |
| SNORD115-34<br>(HBII-52-34) | chr15 | 25477534 | 25477615 | + | SNURF-SNRPN | paternal | C/D snoRNA <sup>75</sup> Post-transcriptional regulator of 5-HT2C pre-mRNA (editing, splicing). Specifically expressed in the brain. | 8 |
| SNORD115-35<br>(HBII-52-35) | chr15 | 25479394 | 25479475 | + | SNURF-SNRPN | paternal | C/D snoRNA <sup>75</sup> Post-transcriptional regulator of 5-HT2C pre-mRNA (editing, splicing). Specifically expressed in the brain. |   |

|                             |       |          |          |   |             |          |                                                                                                                                      | 8 |
|-----------------------------|-------|----------|----------|---|-------------|----------|--------------------------------------------------------------------------------------------------------------------------------------|---|
| SNORD115-36<br>(HBII-52-36) | chr15 | 25481232 | 25481313 | + | SNURF-SNRPN | paternal | C/D snoRNA <sup>75</sup> Post-transcriptional regulator of 5-HT2C pre-mRNA (editing, splicing). Specifically expressed in the brain. | 8 |
| SNORD115-37<br>(HBII-52-37) | chr15 | 25483133 | 25483214 | + | SNURF-SNRPN | paternal | C/D snoRNA <sup>75</sup> Post-transcriptional regulator of 5-HT2C pre-mRNA (editing, splicing). Specifically expressed in the brain. | 8 |
| SNORD115-38<br>(HBII-52-38) | chr15 | 25484985 | 25485066 | + | SNURF-SNRPN | paternal | C/D snoRNA <sup>75</sup> Post-transcriptional regulator of 5-HT2C pre-mRNA (editing, splicing). Specifically expressed in the brain. | 8 |
| SNORD115-39<br>(HBII-52-39) | chr15 | 25486893 | 25486974 | + | SNURF-SNRPN | paternal | C/D snoRNA <sup>75</sup> Post-transcriptional regulator of 5-HT2C pre-mRNA (editing, splicing). Specifically expressed in the brain. | 8 |
| SNORD115-40<br>(HBII-52-40) | chr15 | 25488761 | 25488842 | + | SNURF-SNRPN | paternal | C/D snoRNA <sup>75</sup> Post-transcriptional regulator of 5-HT2C pre-mRNA (editing, splicing). Specifically expressed in the brain. | 8 |
| SNORD115-41<br>(HBII-52-41) | chr15 | 25490625 | 25490706 | + | SNURF-SNRPN | paternal | C/D snoRNA <sup>75</sup> Post-transcriptional regulator of 5-HT2C pre-mRNA (editing, splicing). Specifically expressed in the brain. |   |

|                             |       |          |          |   |             |          |                                                                                                                                      | 8 |
|-----------------------------|-------|----------|----------|---|-------------|----------|--------------------------------------------------------------------------------------------------------------------------------------|---|
| SNORD115-42<br>(HBII-52-42) | chr15 | 25492492 | 25492573 | + | SNURF-SNRPN | paternal | C/D snoRNA <sup>75</sup> Post-transcriptional regulator of 5-HT2C pre-mRNA (editing, splicing). Specifically expressed in the brain. | 8 |
| SNORD115-43<br>(HBII-52-43) | chr15 | 25494345 | 25494426 | + | SNURF-SNRPN | paternal | C/D snoRNA <sup>75</sup> Post-transcriptional regulator of 5-HT2C pre-mRNA (editing, splicing). Specifically expressed in the brain. | 8 |
| SNORD115-44<br>(HBII-52-44) | chr15 | 25496006 | 25496087 | + | SNURF-SNRPN | paternal | C/D snoRNA <sup>75</sup> Post-transcriptional regulator of 5-HT2C pre-mRNA (editing, splicing). Specifically expressed in the brain. | 8 |
| SNORD115-45<br>(HBII-52-45) | chr15 | 25509674 | 25509726 | + | SNURF-SNRPN | paternal | C/D snoRNA <sup>75</sup> Post-transcriptional regulator of 5-HT2C pre-mRNA (editing, splicing). Specifically expressed in the brain. | 8 |
| SNORD115-47<br>(HBII-52-47) | chr15 | 25513664 | 25513696 | + | SNURF-SNRPN | paternal | C/D snoRNA <sup>75</sup> Post-transcriptional regulator of 5-HT2C pre-mRNA (editing, splicing). Specifically expressed in the brain. | 8 |
| SNORD115-48<br>(HBII-52-48) | chr15 | 25514930 | 25515005 | + | SNURF-SNRPN | paternal | C/D snoRNA <sup>75</sup> Post-transcriptional regulator of 5-HT2C pre-mRNA (editing, splicing). Specifically expressed in the brain. |   |

|                          |       |           |           |   |             |          |                                                                                                                                                                                                                                                                                                                                                                                                                                                                                                                 |
|--------------------------|-------|-----------|-----------|---|-------------|----------|-----------------------------------------------------------------------------------------------------------------------------------------------------------------------------------------------------------------------------------------------------------------------------------------------------------------------------------------------------------------------------------------------------------------------------------------------------------------------------------------------------------------|
| SNORD109B<br>(HBII-438B) | chr15 | 25523490  | 25523556  | + | SNURF-SNRPN | paternal | C/D snoRNA <sup>75</sup> Post-transcriptional regulator of 5-HT2C pre-mRNA (editing, splicing). Specifically expressed in the brain. <sup>8</sup>                                                                                                                                                                                                                                                                                                                                                               |
| miR-675                  | chr11 | 2017989   | 2018061   | - | H19         | maternal | The expression of miR-675 and its H19 ncRNA precursor are controlled by SOX9 in human articular chondrocytes and are necessary for the down regulation of an unreported negative regulator of a Type II collagen protein (COL2A1). <sup>76</sup> miR-675 and H19 are overexpressed in colorectal cancer cell lines and primary human colorectal cancer samples and could target the pRB tumour suppressor mRNA. <sup>77</sup> The pre-miR-675 and H19 exon structure are conserved in marsupials. <sup>78</sup> |
| miR-483                  | chr11 | 2155364   | 2155439   | - | IGF2        | paternal | Overexpressed in Wilms' tumors, where it has anti-apoptotic effects by targeting the BBC3/PUMA mRNA, <sup>79</sup> and is induced by the Wnt/ $\beta$ -catenin pathway. <sup>80</sup>                                                                                                                                                                                                                                                                                                                           |
| miR-335                  | chr7  | 130135952 | 130136045 | + | MEST        | paternal | Prognostic marker in colorectal cancer. <sup>81</sup> Overexpression of miR-335 led to decreased cell viability and an increase in apoptosis, supporting its tumour-suppressive function. <sup>82</sup> It is frequently inactivated in human breast cancer. <sup>83</sup> It directly targets pRb mRNA 3' UTR and activate the p53 tumour suppressor pathway to limit cell proliferation and neoplastic cell transformation. <sup>84</sup> miR-335 supresses metastasis and migration through targeting        |

|         |       |          |          |   |        |          |                                                                                                                                                                                                                                                                                                                                                                                                                                                                                                                                                                                                                                                                                      |
|---------|-------|----------|----------|---|--------|----------|--------------------------------------------------------------------------------------------------------------------------------------------------------------------------------------------------------------------------------------------------------------------------------------------------------------------------------------------------------------------------------------------------------------------------------------------------------------------------------------------------------------------------------------------------------------------------------------------------------------------------------------------------------------------------------------|
|         |       |          |          |   |        |          | of the progenitor cell transcription factor SOX4 and extracellular matrix component tenascin C. <sup>85</sup>                                                                                                                                                                                                                                                                                                                                                                                                                                                                                                                                                                        |
| miR-296 | chr20 | 57392670 | 57392749 | - | NESPAS | paternal | Expressed from the paternally expressed long non-coding antisense transcript Nespas which regulates in <i>cis</i> imprinted gene expression at the <i>Gnas</i> imprinted domain. <sup>86</sup> Targets p21WAF1 3'UTR. <sup>87</sup> Regulator of cell migration, invasion and tumourigenicity through inhibition of Scrib. <sup>88</sup> Elevated levels in human brain tumours where it contributes to angiogenesis. <sup>89</sup> miR-296 targets the coding sequence of the Nanog mRNA to inhibit its translation. The silent mutation of its binding sequence can partially reverse the expression of differentiation markers induced upon miR-296 overexpression. <sup>35</sup> |
| miR-298 | chr20 | 57393281 | 57393368 | - | NESPAS | paternal | Expressed from the paternally expressed long non-coding antisense transcript Nespas which regulate in <i>cis</i> imprinted gene expression at the <i>Gnas</i> imprinted domain. <sup>86</sup> Recognizes and inhibits the translation of the $\beta$ -amyloid precursor protein converting enzyme (BACE1). <sup>90</sup>                                                                                                                                                                                                                                                                                                                                                             |

\*: hg19 human coordinates.

**References:**

1. Wheeler G, Ntounia-Fousara S, Granda B, Rathjen T, Dalmay T. Identification of new central nervous system specific mouse microRNAs. *FEBS Lett* 2006; 580:2195-200.
2. Luo H, Zhang H, Zhang Z, Zhang X, Ning B, Guo J, et al. Down-regulated miR-9 and miR-433 in human gastric carcinoma. *J Exp Clin Cancer Res* 2009; 28:82.
3. Ueda T, Volinia S, Okumura H, Shimizu M, Taccioli C, Rossi S, et al. Relation between microRNA expression and progression and prognosis of gastric cancer: a microRNA expression analysis. *Lancet Oncol* 2010; 11:136-46.
4. Duan Z, Choy E, Harmon D, Liu X, Susa M, Mankin H, et al. MicroRNA-199a-3p is downregulated in human osteosarcoma and regulates cell proliferation and migration. *Mol Cancer Ther* 2011; 10:1337-45.
5. Saito Y, Liang G, Egger G, Friedman JM, Chuang JC, Coetzee GA, et al. Specific activation of microRNA-127 with downregulation of the proto-oncogene BCL6 by chromatin-modifying drugs in human cancer cells. *Cancer Cell* 2006; 9:435-43.
6. Liu X, Sempere LF, Ouyang H, Memoli VA, Andrew AS, Luo Y, et al. MicroRNA-31 functions as an oncogenic microRNA in mouse and human lung cancer cells by repressing specific tumor suppressors. *J Clin Invest* 2010; 120:1298-309.
7. Loscher CJ, Hokamp K, Kenna PF, Ivens AC, Humphries P, Palfi A, et al. Altered retinal microRNA expression profile in a mouse model of retinitis pigmentosa. *Genome Biol* 2007; 8:R248.
8. Cavaille J, Buiting K, Kieffmann M, Lalande M, Brannan CI, Horsthemke B, et al. Identification of brain-specific and imprinted small nucleolar RNA genes exhibiting an unusual genomic organization. *Proc Natl Acad Sci U S A* 2000; 97:14311-6.
9. Lo SS, Hung PS, Chen JH, Tu HF, Fang WL, Chen CY, et al. Overexpression of miR-370 and downregulation of its novel target TGFbeta-RII contribute to the progression of gastric carcinoma. *Oncogene* 2012; 31:226-37.
10. Dixon-McIver A, East P, Mein CA, Cazier JB, Molloy G, Chaplin T, et al. Distinctive patterns of microRNA expression associated with karyotype in acute myeloid leukaemia. *PLoS One* 2008; 3:e2141.
11. Castilla MA, Moreno-Bueno G, Romero-Perez L, Van De Vijver K, Biscuola M, Lopez-Garcia MA, et al. Micro-RNA signature of the epithelial-mesenchymal transition in endometrial carcinosarcoma. *J Pathol* 2011; 223:72-80.
12. Girard A, Sachidanandam R, Hannon GJ, Carmell MA. A germline-specific class of small RNAs binds mammalian Piwi proteins. *Nature* 2006; 442:199-202.
13. Valleron W, Laprevotte E, Gautier EF, Quelen C, Demur C, Delabesse E, et al. Specific small nucleolar RNA expression profiles in acute leukemia. *Leukemia* 2012; 26:2052-60.
14. Swarbrick A, Woods SL, Shaw A, Balakrishnan A, Phua Y, Nguyen A, et al. miR-380-5p represses p53 to control cellular survival and is associated with poor outcome in MYCN-amplified neuroblastoma. *Nat Med* 2010; 16:1134-40.
15. Teferedegne B, Murata H, Quinones M, Peden K, Lewis AM. Patterns of microRNA expression in non-human primate cells correlate with neoplastic development in vitro. *PLoS One* 2010; 5:e14416.
16. Ohdaira H, Sekiguchi M, Miyata K, Yoshida K. MicroRNA-494 suppresses cell proliferation and induces senescence in A549 lung cancer cells. *Cell Prolif* 2012; 45:32-8.
17. Kim WK, Park M, Kim YK, Tae YK, Yang HK, Lee JM, et al. MicroRNA-494 Downregulates KIT and Inhibits Gastrointestinal Stromal Tumor Cell Proliferation. *Clin Cancer Res* 2011; 17:7584-94.
18. Shende VR, Goldrick MM, Ramani S, Earnest DJ. Expression and rhythmic modulation of circulating microRNAs targeting the clock gene Bmal1 in mice. *PLoS One* 2011; 6:e22586.
19. Hwang-Verslues WW, Chang PH, Wei PC, Yang CY, Huang CK, Kuo WH, et al. miR-495 is upregulated by E12/E47 in breast cancer stem cells, and promotes oncogenesis and hypoxia resistance via downregulation of E-cadherin and REDD1. *Oncogene* 2011; 30:2463-74.
20. Dacic S, Kelly L, Shuai Y, Nikiforova MN. miRNA expression profiling of lung adenocarcinomas: correlation with mutational status. *Mod Pathol* 2010; 23:1577-82.
21. Simion A, Laudadio I, Prevot PP, Raynaud P, Lemaigre FP, Jacquemin P. MiR-495 and miR-218 regulate the expression of the Onecut transcription factors HNF-6 and OC-2. *Biochem Biophys Res Commun* 2010; 391:293-8.

22. Ye G, Fu G, Cui S, Zhao S, Bernaudo S, Bai Y, et al. MicroRNA 376c enhances ovarian cancer cell survival by targeting activin receptor-like kinase 7: implications for chemoresistance. *J Cell Sci* 2011; 124:359-68.
23. Wang F, Yu J, Yang GH, Wang XS, Zhang JW. Regulation of erythroid differentiation by miR-376a and its targets. *Cell Res* 2011; 21:1196-209.
24. Lee EJ, Gusev Y, Jiang J, Nuovo GJ, Lerner MR, Frankel WL, et al. Expression profiling identifies microRNA signature in pancreatic cancer. *Int J Cancer* 2007; 120:1046-54.
25. Lowery AJ, Miller N, Devaney A, McNeill RE, Davoren PA, Lemetre C, et al. MicroRNA signatures predict oestrogen receptor, progesterone receptor and HER2/neu receptor status in breast cancer. *Breast Cancer Res* 2009; 11:R27.
26. Lee YN, Brandal S, Noel P, Wentzel E, Mendell JT, McDevitt MA, et al. KIT signaling regulates MITF expression through miRNAs in normal and malignant mast cell proliferation. *Blood* 2011; 117:3629-40.
27. Gattolliat CH, Thomas L, Ciafre SA, Meurice G, Le Teuff G, Job B, et al. Expression of miR-487b and miR-410 encoded by 14q32.31 locus is a prognostic marker in neuroblastoma. *Br J Cancer* 2011; 105:1352-61.
28. Thayanithy V, Sarver AL, Kartha RV, Li L, Angstadt AY, Breen M, et al. Perturbation of 14q32 miRNAs-cMYC gene network in osteosarcoma. *Bone* 2012; 50:171-81.
29. Kriegl AJ, Fang Y, Liu Y, Tian Z, Mladinov D, Matus IR, et al. MicroRNA-target pairs in human renal epithelial cells treated with transforming growth factor beta 1: a novel role of miR-382. *Nucleic Acids Res* 2010; 38:8338-47.
30. Li Z, Lu J, Sun M, Mi S, Zhang H, Luo RT, et al. Distinct microRNA expression profiles in acute myeloid leukemia with common translocations. *Proc Natl Acad Sci U S A* 2008; 105:15535-40.
31. Schratt GM, Tuebing F, Nigh EA, Kane CG, Sabatini ME, Kiebler M, et al. A brain-specific microRNA regulates dendritic spine development. *Nature* 2006; 439:283-9.
32. Fiore R, Khudayberdiev S, Christensen M, Siegel G, Flavell SW, Kim TK, et al. Mef2-mediated transcription of the miR379-410 cluster regulates activity-dependent dendritogenesis by fine-tuning Pumilio2 protein levels. *Embo J* 2009; 28:697-710.
33. Jimenez-Mateos EM, Engel T, Merino-Serrais P, McKiernan RC, Tanaka K, Mouri G, et al. Silencing microRNA-134 produces neuroprotective and prolonged seizure-suppressive effects. *Nat Med* 2012; 18:1087-94.
34. Gao J, Wang WY, Mao YW, Graff J, Guan JS, Pan L, et al. A novel pathway regulates memory and plasticity via SIRT1 and miR-134. *Nature* 2010; 466:1105-9.
35. Tay Y, Zhang J, Thomson AM, Lim B, Rigoutsos I. MicroRNAs to Nanog, Oct4 and Sox2 coding regions modulate embryonic stem cell differentiation. *Nature* 2008; 455:1124-8.
36. Shin KH, Pucar A, Kim RH, Bae SD, Chen W, Kang MK, et al. Identification of senescence-inducing microRNAs in normal human keratinocytes. *Int J Oncol* 2011; 39:1205-11.
37. Cohen JE, Lee PR, Chen S, Li W, Fields RD. MicroRNA regulation of homeostatic synaptic plasticity. *Proc Natl Acad Sci U S A* 2011; 108:11650-5.
38. Kim TH, Kim YK, Kwon Y, Heo JH, Kang H, Kim G, et al. Deregulation of miR-519a, 153, and 485-5p and its clinicopathological relevance in ovarian epithelial tumours. *Histopathology* 2010; 57:734-43.
39. Wang LL, Zhang Z, Li Q, Yang R, Pei X, Xu Y, et al. Ethanol exposure induces differential microRNA and target gene expression and teratogenic effects which can be suppressed by folic acid supplementation. *Hum Reprod* 2009; 24:562-79.
40. Choong ML, Yang HH, McNiece I. MicroRNA expression profiling during human cord blood-derived CD34 cell erythropoiesis. *Exp Hematol* 2007; 35:551-64.
41. Williams AE, Moschos SA, Perry MM, Barnes PJ, Lindsay MA. Maternally imprinted microRNAs are differentially expressed during mouse and human lung development. *Dev Dyn* 2007; 236:572-80.
42. Noren Hooten N, Abdelmohsen K, Gorospe M, Ejiogu N, Zonderman AB, Evans MK. microRNA expression patterns reveal differential expression of target genes with age. *PLoS One* 2010; 5:e10724.
43. Chang SJ, Weng SL, Hsieh JY, Wang TY, Chang MD, Wang HW. MicroRNA-34a modulates genes involved in cellular motility and oxidative phosphorylation in neural precursors derived from human umbilical cord mesenchymal stem cells. *BMC Med Genomics* 2011; 4:65.



44. Maes OC, Sarojini H, Wang E. Stepwise up-regulation of microRNA expression levels from replicating to reversible and irreversible growth arrest states in WI-38 human fibroblasts. *J Cell Physiol* 2009; 221:109-19.
45. Zheng B, Liang L, Huang S, Zha R, Liu L, Jia D, et al. MicroRNA-409 suppresses tumour cell invasion and metastasis by directly targeting radixin in gastric cancers. *Oncogene* 2011.
46. Urduinguio RG, Fernandez AF, Lopez-Nieva P, Rossi S, Huertas D, Kulis M, et al. Disrupted microRNA expression caused by Mecp2 loss in a mouse model of Rett syndrome. *Epigenetics* 2010; 5:656-63.
47. Gao W, Shen H, Liu L, Xu J, Shu Y. MiR-21 overexpression in human primary squamous cell lung carcinoma is associated with poor patient prognosis. *J Cancer Res Clin Oncol* 2011; 137:557-66.
48. Miyoshi N, Ishii H, Nagano H, Haraguchi N, Dewi DL, Kano Y, et al. Reprogramming of mouse and human cells to pluripotency using mature microRNAs. *Cell Stem Cell* 2011; 8:633-8.
49. Shih KK, Qin LX, Tanner EJ, Zhou Q, Bisogna M, Dao F, et al. A microRNA survival signature (MISS) for advanced ovarian cancer. *Gynecol Oncol* 2011; 121:444-50.
50. Chien WW, Domenech C, Catallo R, Kaddar T, Magaud JP, Salles G, et al. Cyclin-dependent kinase 1 expression is inhibited by p16(INK4a) at the post-transcriptional level through the microRNA pathway. *Oncogene* 2011; 30:1880-91.
51. Lv SQ, Kim YH, Giulio F, Shalaby T, Nobusawa S, Yang H, et al. Genetic Alterations in MicroRNAs in Medulloblastomas. *Brain Pathol* 2011.
52. Schepeler T, Reinert JT, Ostenfeld MS, Christensen LL, Silahtaroglu AN, Dyrskjot L, et al. Diagnostic and prognostic microRNAs in stage II colon cancer. *Cancer Res* 2008; 68:6416-24.
53. Zhao JJ, Yang J, Lin J, Yao N, Zhu Y, Zheng J, et al. Identification of miRNAs associated with tumorigenesis of retinoblastoma by miRNA microarray analysis. *Childs Nerv Syst* 2009; 25:13-20.
54. Zhang S, Shan C, Kong G, Du Y, Ye L, Zhang X. MicroRNA-520e suppresses growth of hepatoma cells by targeting the NF-kappaB-inducing kinase (NIK). *Oncogene* 2011.
55. Kotlabova K, Doucha J, Hromadnikova I. Placental-specific microRNA in maternal circulation--identification of appropriate pregnancy-associated microRNAs with diagnostic potential. *J Reprod Immunol* 2011; 89:185-91.
56. Yadav D, Ngolah J, Lim RS, Krishnamurthy S, Bui JD. Cutting edge: down-regulation of MHC class I-related chain A on tumor cells by IFN-gamma-induced microRNA. *J Immunol* 2009; 182:39-43.
57. Hu N, Zhang J, Cui W, Kong G, Zhang S, Yue L, et al. miR-520b regulates migration of breast cancer cells by targeting hepatitis B X-interacting protein and interleukin-8. *J Biol Chem* 2011; 286:13714-22.
58. Huang Q, Gumireddy K, Schrier M, le Sage C, Nagel R, Nair S, et al. The microRNAs miR-373 and miR-520c promote tumour invasion and metastasis. *Nat Cell Biol* 2008; 10:202-10.
59. O'Day E, Lal A. MicroRNAs and their target gene networks in breast cancer. *Breast Cancer Res* 2010; 12:201.
60. Ishibashi O, Ohkuchi A, Ali MM, Kurashina R, Luo SS, Ishikawa T, et al. Hydroxysteroid (17-beta) Dehydrogenase 1 Is Dysregulated by Mir-210 and Mir-518c That Are Aberrantly Expressed in Preeclamptic Placentas: A Novel Marker for Predicting Preeclampsia. *Hypertension* 2011.
61. Toffanin S, Hoshida Y, Lachenmayer A, Villanueva A, Cabellos L, Minguez B, et al. MicroRNA-based classification of hepatocellular carcinoma and oncogenic role of miR-517a. *Gastroenterology* 2011; 140:1618-28 e16.
62. Martinelli R, Nardelli C, Pilone V, Buonomo T, Liguori R, Castano I, et al. miR-519d overexpression is associated with human obesity. *Obesity (Silver Spring)* 2010; 18:2170-6.
63. Fornari F, Milazzo M, Chieco P, Negrini M, Marasco E, Capranico G, et al. In hepatocellular carcinoma miR-519d is upregulated by p53 and DNA hypomethylation and targets CDKN1A/p21, PTEN, AKT3 and TIMP2. *J Pathol* 2012.

64. Li M, Lee KF, Lu Y, Clarke I, Shih D, Eberhart C, et al. Frequent amplification of a chr19q13.41 microRNA polycistron in aggressive primitive neuroectodermal brain tumors. *Cancer Cell* 2009; 16:533-46.
65. Liao R, Sun J, Zhang L, Lou G, Chen M, Zhou D, et al. MicroRNAs play a role in the development of human hematopoietic stem cells. *J Cell Biochem* 2008; 104:805-17.
66. Su JL, Chen PB, Chen YH, Chen SC, Chang YW, Jan YH, et al. Downregulation of microRNA miR-520h by E1A contributes to anticancer activity. *Cancer Res* 2010; 70:5096-108.
67. Richardson K, Louie-Gao Q, Arnett DK, Parnell LD, Lai CQ, Davalos A, et al. The PLIN4 variant rs8887 modulates obesity related phenotypes in humans through creation of a novel miR-522 seed site. *PLoS One* 2011; 6:e17944.
68. Looijenga LH, Gillis AJ, Stoop HJ, Hersmus R, Oosterhuis JW. Chromosomes and expression in human testicular germ-cell tumors: insight into their cell of origin and pathogenesis. *Ann N Y Acad Sci* 2007; 1120:187-214.
69. Lian J, Zhang X, Tian H, Liang N, Wang Y, Liang C, et al. Altered microRNA expression in patients with non-obstructive azoospermia. *Reprod Biol Endocrinol* 2009; 7:13.
70. Wilson KD, Venkatasubrahmanyam S, Jia F, Sun N, Butte AJ, Wu JC. MicroRNA profiling of human-induced pluripotent stem cells. *Stem Cells Dev* 2009; 18:749-58.
71. Cairo S, Wang Y, de Reynies A, Durooure K, Dahan J, Redon MJ, et al. Stem cell-like micro-RNA signature driven by Myc in aggressive liver cancer. *Proc Natl Acad Sci U S A* 2010; 107:20471-6.
72. Kim H, Lee G, Ganat Y, Papapetrou EP, Lipchina I, Socci ND, et al. miR-371-3 expression predicts neural differentiation propensity in human pluripotent stem cells. *Cell Stem Cell* 2011; 8:695-706.
73. Subramanyam D, Lamouille S, Judson RL, Liu JY, Bucay N, Derynck R, et al. Multiple targets of miR-302 and miR-372 promote reprogramming of human fibroblasts to induced pluripotent stem cells. *Nat Biotechnol* 2011; 29:443-8.
74. Yan GR, Xu SH, Tan ZL, Liu L, He QY. Global identification of miR-373-regulated genes in breast cancer by quantitative proteomics. *Proteomics* 2011; 11:912-20.
75. Runte M, Huttenhofer A, Gross S, Kiefmann M, Horsthemke B, Buiting K. The IC-SNURF-SNRPN transcript serves as a host for multiple small nucleolar RNA species and as an antisense RNA for UBE3A. *Hum Mol Genet* 2001; 10:2687-700.
76. Dudek KA, Lafont JE, Martinez-Sanchez A, Murphy CL. Type II collagen expression is regulated by tissue-specific miR-675 in human articular chondrocytes. *J Biol Chem* 2010; 285:24381-7.
77. Tsang WP, Ng EK, Ng SS, Jin H, Yu J, Sung JJ, et al. Oncofetal H19-derived miR-675 regulates tumor suppressor RB in human colorectal cancer. *Carcinogenesis* 2010; 31:350-8.
78. Smits G, Mungall AJ, Griffiths-Jones S, Smith P, Beury D, Matthews L, et al. Conservation of the H19 noncoding RNA and H19-IGF2 imprinting mechanism in therians. *Nat Genet* 2008; 40:971-6.
79. Veronese A, Lupini L, Consiglio J, Visone R, Ferracin M, Fornari F, et al. Oncogenic role of miR-483-3p at the IGF2/483 locus. *Cancer Res* 2010; 70:3140-9.
80. Veronese A, Visone R, Consiglio J, Acunzo M, Lupini L, Kim T, et al. Mutated beta-catenin evades a microRNA-dependent regulatory loop. *Proc Natl Acad Sci U S A* 2011; 108:4840-5.
81. Vickers MM, Bar J, Gorn-Hondermann I, Yarom N, Daneshmand M, Hanson JE, et al. Stage-dependent differential expression of microRNAs in colorectal cancer: potential role as markers of metastatic disease. *Clin Exp Metastasis* 2012; 29:123-32.
82. Heyn H, Engelmann M, Schreek S, Ahrens P, Lehmann U, Kreipe H, et al. MicroRNA miR-335 is crucial for the BRCA1 regulatory cascade in breast cancer development. *Int J Cancer* 2011; 129:2797-806.
83. Png KJ, Yoshida M, Zhang XH, Shu W, Lee H, Rimner A, et al. MicroRNA-335 inhibits tumor reinitiation and is silenced through genetic and epigenetic mechanisms in human breast cancer. *Genes Dev* 2011; 25:226-31.
84. Scarola M, Schoeftner S, Schneider C, Benetti R. miR-335 directly targets Rb1 (pRb/p105) in a proximal connection to p53-dependent stress response. *Cancer Res* 2010; 70:6925-33.

85. Tavazoie SF, Alarcon C, Oskarsson T, Padua D, Wang Q, Bos PD, et al. Endogenous human microRNAs that suppress breast cancer metastasis. *Nature* 2008; 451:147-52.
86. Robson JE, Eaton SA, Underhill P, Williams D, Peters J. MicroRNAs 296 and 298 are imprinted and part of the GNAS/Gnas cluster and miR-296 targets IKBKE and Tmed9. *Rna* 2012; 18:135-44.
87. Yoon AR, Gao R, Kaul Z, Choi IK, Ryu J, Noble JR, et al. MicroRNA-296 is enriched in cancer cells and downregulates p21WAF1 mRNA expression via interaction with its 3' untranslated region. *Nucleic Acids Res* 2011; 39:8078-91.
88. Vaira V, Favarsani A, Dohi T, Montorsi M, Augello C, Gatti S, et al. miR-296 regulation of a cell polarity-cell plasticity module controls tumor progression. *Oncogene* 2012; 31:27-38.
89. Wurdinger T, Tannous BA, Saydam O, Skog J, Grau S, Soutschek J, et al. miR-296 regulates growth factor receptor overexpression in angiogenic endothelial cells. *Cancer Cell* 2008; 14:382-93.
90. Boissonneault V, Plante I, Rivest S, Provost P. MicroRNA-298 and microRNA-328 regulate expression of mouse beta-amyloid precursor protein-converting enzyme 1. *J Biol Chem* 2009; 284:1971-81.
